# Supplementary material for: Rainfall redistribution in subtropical Chinese forests changes over 22 years
Source: Copernicus journal article supplement (doi:10.5194/hess-28-3837-2024), 2024-08-23
Supplement: Supplementary file 1 [file hess-28-3837-2024-supplement.pdf]

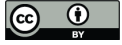

*Supplement of*

## **Rainfall redistribution in subtropical Chinese forests changes over 22 years**

**Wanjun Zhang et al.**

*Correspondence to:* Xin Xiong (xiongx@lsbg.cn) and Juxiu Liu (ljxiu@scbg.ac.cn)

The copyright of individual parts of the supplement might differ from the article licence.

1 **Table Supplement**

2 **Table S1** Forest community structure and biodiversity

| Forest type                 | Community composition                                                                                                                                                       | $R_0$ | $H'$ | $J$  | $D$  |
|-----------------------------|-----------------------------------------------------------------------------------------------------------------------------------------------------------------------------|-------|------|------|------|
| Broadleaf forest            | Tree<br>( <i>Syzygium acuminatissima</i> , <i>Cryptocarya chinensis</i> , <i>Gironniera subaequalis</i> Planch., <i>Schima superba</i> , <i>Aporosa yunnanensis</i> , etc.) | 13.66 | 2.69 | 1.04 | 0.73 |
|                             | Shrub<br>( <i>Rhodomyrtus tomentosa</i> (Ait.) Hassk., <i>Baeckea frutescens</i> L., <i>Melastoma candidum</i> D. Don, etc.)                                                | 18.03 | 2.66 | 0.93 | 0.75 |
|                             | Herb<br>( <i>Eriachne pallescens</i> R. Br., <i>Pteris vittata</i> L., <i>Ischaemum ciliare</i> Retz., etc.)                                                                | 7.85  | 2.60 | 1.33 | 0.79 |
| Mixed broadleaf-pine forest | Tree<br>( <i>Cryptocarya chinensis</i> , <i>Schima superba</i> , <i>Pinus massoniana</i> ., etc)                                                                            | 7.14  | 2.24 | 1.17 | 0.71 |
|                             | Shrub<br>( <i>Litsea rotundifolia</i> var. <i>oblongifolia</i> (Nees) C. K. Allen, <i>Psychotria asiatica</i> L., <i>Ardisia quinquegona</i> Blume, etc.)                   | 8.80  | 2.26 | 1.05 | 0.70 |
|                             | Herb<br>( <i>Gahnia tristis</i> Nees in Hooker & Arnott)                                                                                                                    | 4.80  | 1.69 | 1.19 | 0.60 |
| Pine forest                 | Tree<br>( <i>Pinus massoniana</i> .)                                                                                                                                        | 8.65  | 2.62 | 1.24 | 0.79 |
|                             | Shrub<br>( <i>Blastus cochinchinensis</i> Lour., <i>Psychotria asiatica</i> L., etc.)                                                                                       | 14.83 | 3.08 | 1.16 | 0.83 |
|                             | Herb<br>( <i>Tectaria harlandii</i> (Hook.) C. M. Kuo, <i>Alpinia oblongifolia</i> Hayata, etc.)                                                                            | 8.20  | 2.29 | 1.16 | 0.71 |

3  $R_0$ : Patrick richness,  $H'$ : Shannon-Weiner index,  $J$ : Pielou index,  $D$ : Simpson index

4

5 **Table S2** Growth indicators of 8 monitored tree species in the forests

| Forest type                 | No. |                                                     | DBH        | Height     | Crown area |
|-----------------------------|-----|-----------------------------------------------------|------------|------------|------------|
| Broadleaf forest            | SF1 | <i>Acmena acuminatissima</i> (Blume) Merr. et Perry | 23.6 ± 5.3 | 12.1 ± 2.1 | 18.1 ± 8.3 |
|                             | SF2 | <i>Cryptocarya chinensis</i> (Hance) Hensl.         | 28.8 ± 2.2 | 16.5 ± 1.4 | 28.5 ± 5.1 |
|                             | SF3 | <i>Gironniera subaequalis</i> Planch.               | 23.8 ± 0.5 | 13.8 ± 0.7 | 26.3 ± 1.9 |
|                             | SF4 | <i>Schima superba</i> Gardn. et Champ.              | 30.6 ± 1.7 | 20.4 ± 0.5 | 21.9 ± 2.9 |
| Mixed broadleaf-pine forest | SF5 | <i>Castanea henryi</i> (Skam) Rehd. et Wils.        | 24.9 ± 3.2 | 12.2 ± 1.5 | 34.9 ± 1.0 |
| Pine forest                 | SF6 | <i>Schima superba</i> Gardn. et Champ.              | 21.6 ± 1.2 | 13.2 ± 0.8 | 18.1 ± 2.2 |
|                             | SF7 | <i>Pinus massoniana</i> Lamb.                       | 35.7 ± 1.5 | 15.2 ± 0.8 | 27.5 ± 7.4 |
|                             | SF8 | <i>Pinus massoniana</i> Lamb.                       | 34.9 ± 1.2 | 10.2 ± 2.6 | 27.1 ± 7.2 |

6 DBH: diameter at breast height. 3 replications of each tree species, Mean ± SD

7

8 **Table S3** Anomaly of annual rainfall, throughfall and stemflow in the three forest types from 2001-  
 9 2022

| Year | Rainfall | Broadleaf forest |       | Mixed forest |      | Pine forest |      |
|------|----------|------------------|-------|--------------|------|-------------|------|
|      |          | TF               | SF    | TF           | SF   | TF          | SF   |
| 2001 | 1889.2   |                  | 30.4  | 1772.9       | 25.7 | 1724.9      | 11.1 |
| 2002 | 1818.9   | 1550.0           | 17.2  | 1401.5       |      | 1632.5      | 12.8 |
| 2003 | 1344.7   | 1150.5           | 13.2  | 1089.1       | 13.1 | 1182.4      | 12.1 |
| 2004 | 1328.1   | 1242.1           | 18.4  | 954.2        | 19.4 | 1254.6      | 12.4 |
| 2005 | 1615.0   | 1513.1           | 22.3  | 1458.1       | 21.8 | 1517.3      | 13.9 |
| 2006 | 2227.6   | 1581.2           | 30.9  | 2000.5       | 32.2 | 2048.7      | 24.8 |
| 2007 | 1423.1   | 1377.8           | 17.1  | 1306.3       | 18.8 | 1379.8      | 9.0  |
| 2008 | 2361.1   | 2067.6           | 22.0  | 2186.6       | 20.8 | 2192.6      | 13.3 |
| 2009 | 1760.4   | 1264.7           | 90.8  | 1309.0       | 48.3 | 1564.5      | 15.0 |
| 2010 | 1735.8   | 1509.3           | 86.8  | 1531.9       | 55.3 | 1519.0      | 9.2  |
| 2011 | 1370.0   | 1249.6           | 91.5  | 1223.9       | 38.8 | 1214.7      | 10.5 |
| 2012 | 2028.3   | 1856.9           | 114.0 | 1684.0       | 67.0 | 1676.4      | 19.9 |
| 2013 | 2036.6   | 1652.9           | 101.9 | 1579.1       | 56.9 | 1522.3      | 33.7 |
| 2014 | 1979.1   | 1457.0           | 97.3  | 1624.9       | 44.0 | 1645.4      | 30.1 |
| 2015 | 2182.0   | 1641.1           | 88.5  | 1870.4       | 71.1 | 1883.1      | 11.1 |
| 2016 | 1920.8   | 1693.2           | 100.1 | 1776.1       | 74.0 | 1749.6      | 22.6 |
| 2017 | 1860.8   | 1609.5           | 86.7  | 1673.1       | 70.3 | 1635.4      | 19.5 |
| 2018 | 2209.3   | 1664.8           | 119.7 | 1600.6       | 71.0 | 1599.7      | 22.7 |
| 2019 | 2158.7   | 1725.7           | 119.1 | 1895.7       | 67.9 | 1967.9      | 16.8 |
| 2020 | 1934.9   | 1543.5           | 109.4 | 1680.7       | 80.4 | 1534.8      | 35.4 |
| 2021 | 1506.8   | 1100.7           | 40.2  | 1203.1       | 49.4 | 1242.0      | 27.7 |
| 2022 | 1978.3   | 1517.7           | 84.1  | 1754.2       | 67.3 | 1722.0      | 26.2 |
| Mean | 1848.6   | 1522.3           | 68.3  | 1571.6       | 48.3 | 1609.5      | 18.6 |

## Figure Supplement

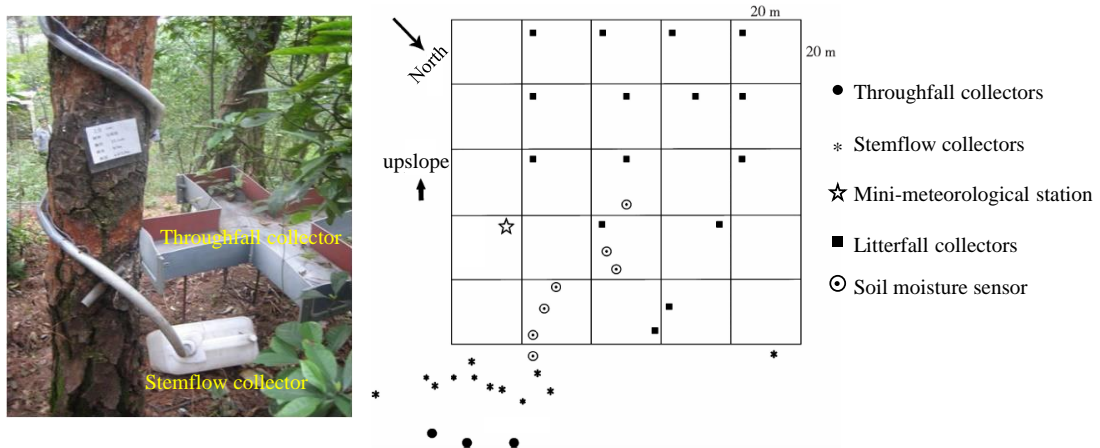

**Fig. S1** Collecting equipment and their locations of throughfall and stemflow

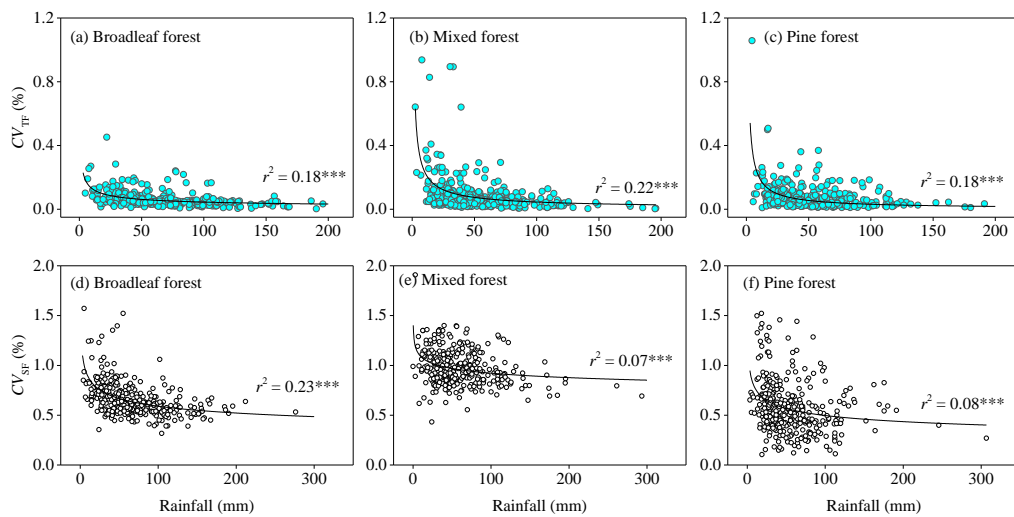

**Fig. S2** Coefficient of variation changing of throughfall ratio (a~c) and stemflow ratio (d~f) with rainfall volume.  $r$ : Pearson coefficient of correlation; \*:  $P < 0.05$ , \*\*:  $P < 0.01$ , \*\*\*:  $P < 0.001$
